# Supplementary material for: Optimization Preparation of Indium Tin Oxide Nanoparticles via Microemulsion Method Using Orthogonal Experiment
Source: MDPI journal article supplement (doi:10.3390/cryst11111387), 2021-11-13
Supplement: s1 [file s1]

# Supporting Information for

## Optimization preparation of indium tin oxide powders via microemulsion method using orthogonal experiment

Zhucheng Jiang, <sup>†</sup> Ting Liu, Xiaoyu Zhai, and Jiaxiang Liu\*

*Beijing Key Laboratory of Electrochemical Process and Technology for Materials,  
College of Materials Science and Engineering, Beijing University of Chemical  
Technology, Beijing 100029, China*

\* Correspondence: ljxpost@263.net

### List of Contents

#### 4. Preparation mechanism of ITO powders

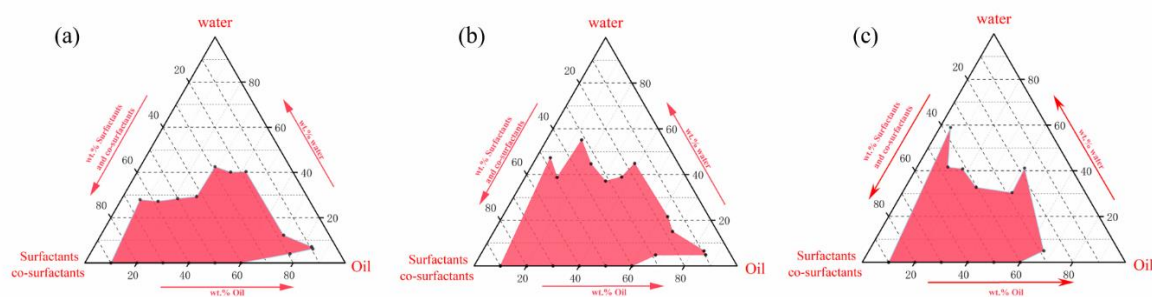

**Figure S1.** Pseudo-ternary phase diagram of microemulsion with different surfactant and cosurfactant ratios (a)5:1, (b)5:2, (c)5:3.
