# Supplementary material for: Optimization Preparation of Indium Tin Oxide Nanoparticles via Microemulsion Method Using Orthogonal Experiment
Source: MDPI journal article supplement (doi:10.3390/cryst11111387), 2021-11-13
Supplement: s1 [file s1]

Archive with 1 entries (1 files):
- crystals-1395755-supplementary.pdf
